# Supplementary material
Source: publisher figshare collection journal article supplement (https://acs.figshare.com/ndownloader/files/4057003)

The photo of some new compounds **6**, **7** and **8** under lamp  $\lambda=366$  nm TL8W/08F8T5/BLC Philips made in Holland are shown for the better comparison.

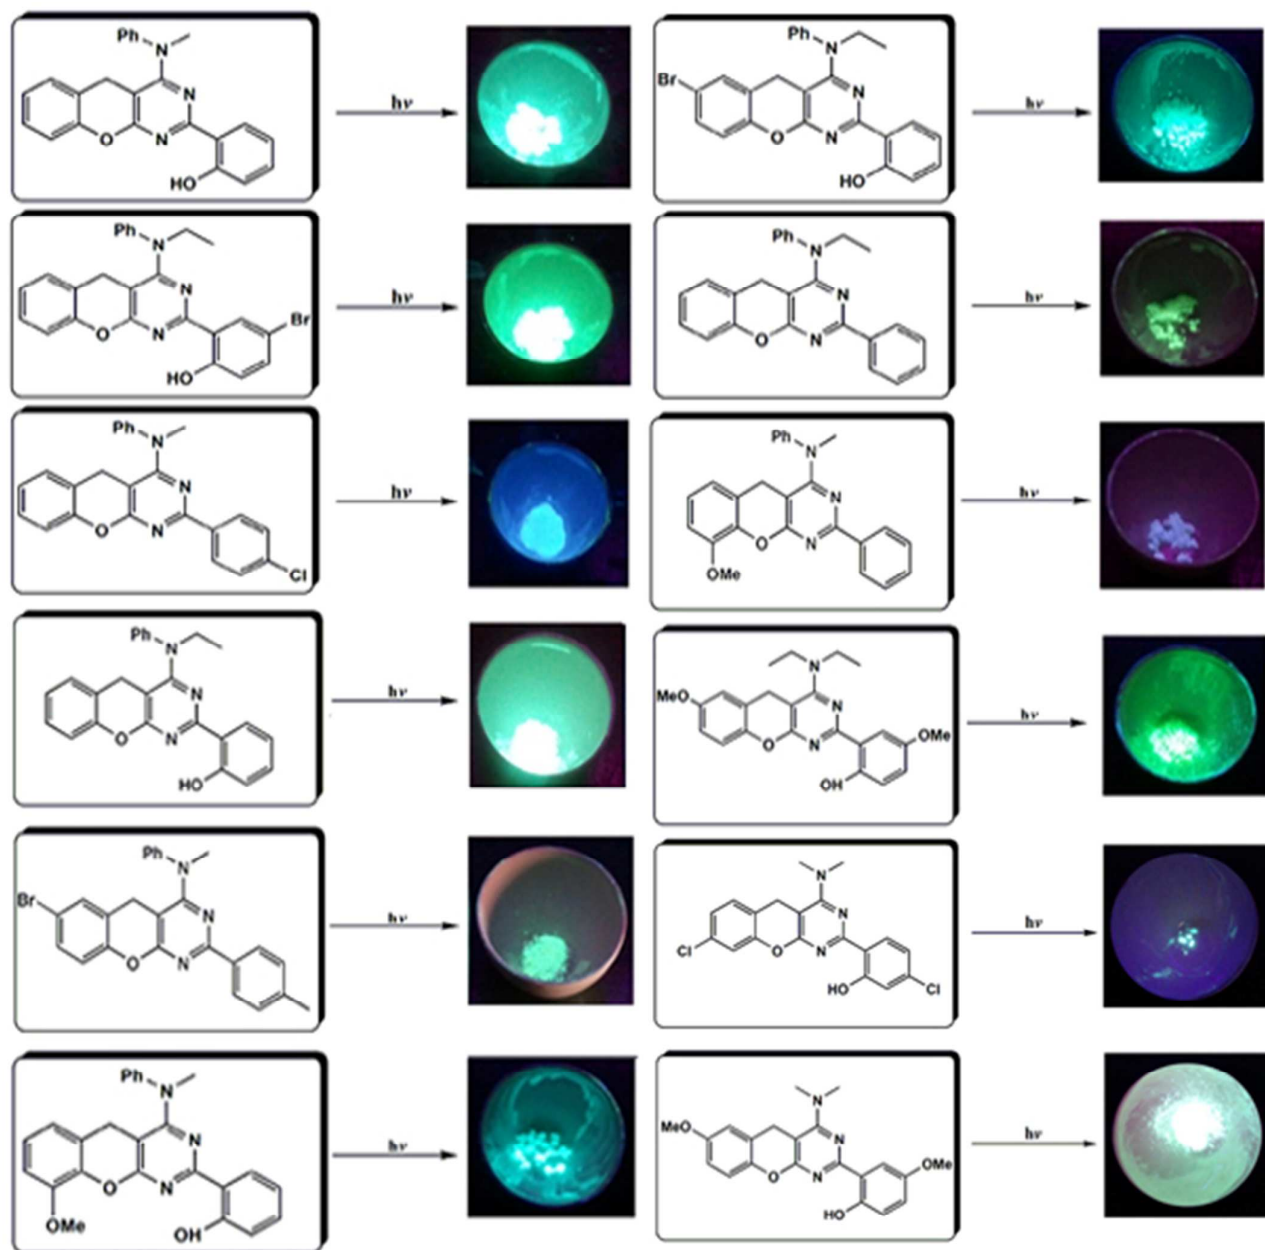

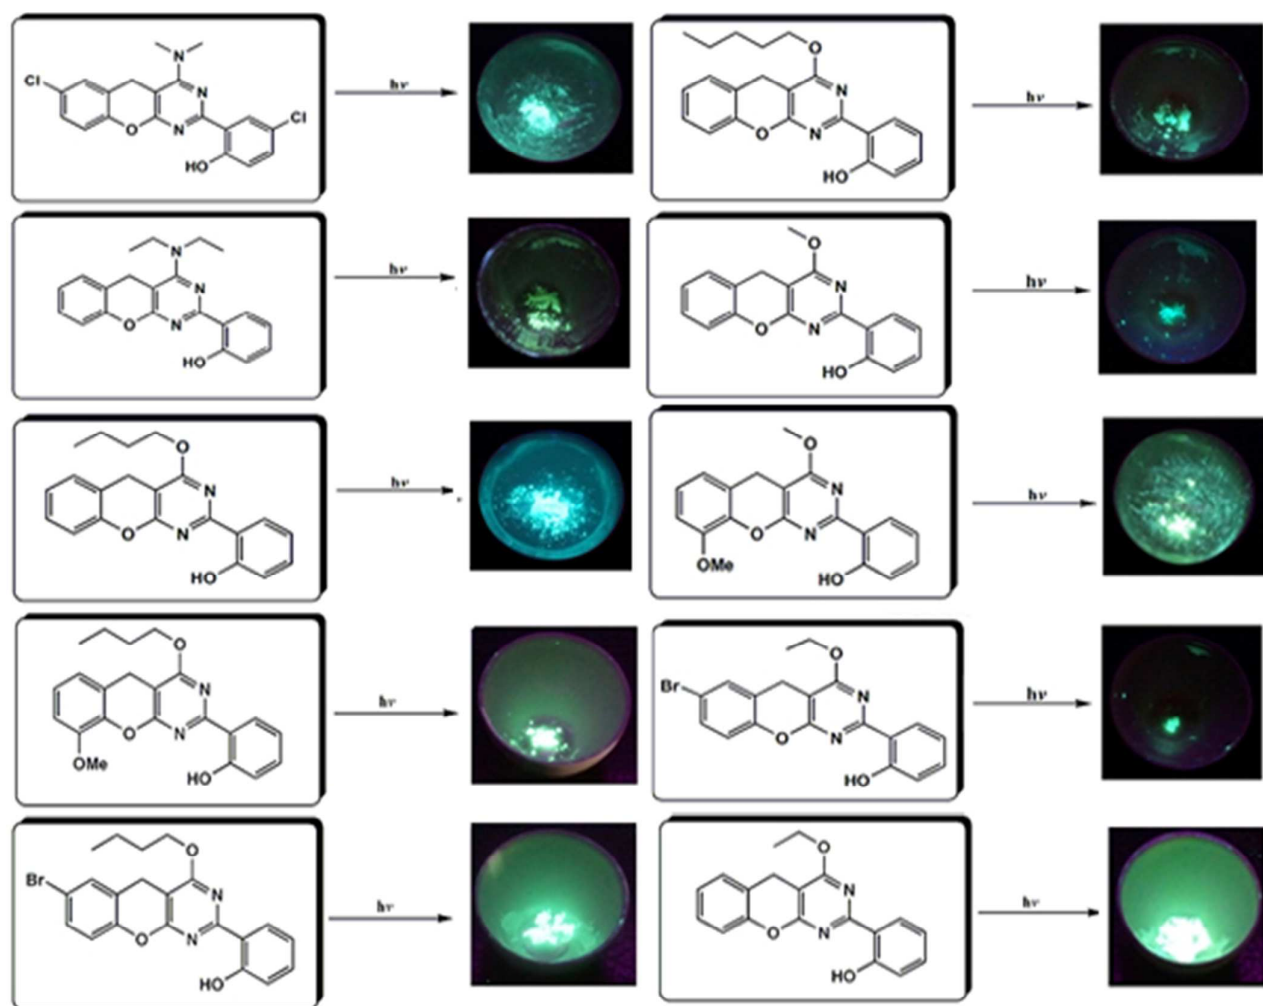

Supplement: Supplementary file 1 [file 4057003]
